# Supplementary material for: Analyzing the miRNA-Gene Networks to Mine the Important miRNAs under Skin of Human and Mouse
Source: Biomed Res Int. 2016 Sep 5;2016:5469371. doi: 10.1155/2016/5469371 (PMC5027296; doi:10.1155/2016/5469371)
Supplement: Supplementary file 1 — Figure S1: A summarizes this entire methodology. 1627 of these genes are related with the integument phenotype (MP:0010771). The expression data of 1487 IGs of mouse and human were downloaded from the Gene Expression Omnibus (GEO). MicroRNAs (miRNAs) that potential regulate IGs were predicted by miRanda, miRTarBase and miRDB. The regulation network of miRNAs-IGs and IGs-IGs was integrated, and the networks were visualized in Cytoscape. Figure S2: Chromosome location for integument genes, left for human and right for mouse. The distribution of IGs on chromosomes for human and mouse was investigated by two R packages (org.Mm.eg.db and org.Hs.eg.db). 1627 IGs are dispersed along the chromosomes of human and mouse. Table S1: The informations of microarray data used in this paper. Table S2: The common pairs of miRNA-target gene predicted by three databases (miRanda, miRTarBase and miRDB). [file 5469371.f1.zip]

Archive with 5 entries (4 files):
- supplementary materials/Figure S1.eps
- supplementary materials/Figure S2.eps
- supplementary materials/Table S1 The informations of microarray data.xls
- supplementary materials/Table S2 The common pairs of miRNA-target gene predicted by three databases.xls
- supplementary materials/
