# Supplementary material for: Analyzing the miRNA-Gene Networks to Mine the Important miRNAs under Skin of Human and Mouse
Source: Biomed Res Int. 2016 Sep 5;2016:5469371. doi: 10.1155/2016/5469371 (PMC5027296; doi:10.1155/2016/5469371)
Supplement: Supplementary file 1 — Figure S1: A summarizes this entire methodology. 1627 of these genes are related with the integument phenotype (MP:0010771). The expression data of 1487 IGs of mouse and human were downloaded from the Gene Expression Omnibus (GEO). MicroRNAs (miRNAs) that potential regulate IGs were predicted by miRanda, miRTarBase and miRDB. The regulation network of miRNAs-IGs and IGs-IGs was integrated, and the networks were visualized in Cytoscape. Figure S2: Chromosome location for integument genes, left for human and right for mouse. The distribution of IGs on chromosomes for human and mouse was investigated by two R packages (org.Mm.eg.db and org.Hs.eg.db). 1627 IGs are dispersed along the chromosomes of human and mouse. Table S1: The informations of microarray data used in this paper. Table S2: The common pairs of miRNA-target gene predicted by three databases (miRanda, miRTarBase and miRDB). [file 5469371.f1.zip › supplementary materials/Table S1 The informations of microarray data.xls]

## Sheet: Mus musculus
Platform	Chip Data	Series_geo_accession	Tissues
GPL1261	GSM684676	GSE27628	back skin
GPL1261	GSM684677	GSE27628	back skin
GPL1261	GSM684678	GSE27628	back skin
GPL1261	GSM684679	GSE27628	back skin
GPL1261	GSM684680	GSE27628	back skin
GPL1261	GSM684681	GSE27628	back skin
GPL1261	GSM684682	GSE27628	back skin
GPL1261	GSM684683	GSE27628	back skin
GPL1261	GSM684684	GSE27628	back skin
GPL1261	GSM684685	GSE27628	back skin
GPL1261	GSM684686	GSE27628	back skin
GPL1261	GSM684687	GSE27628	back skin
GPL1261	GSM684688	GSE27628	back skin
GPL1261	GSM684689	GSE27628	back skin
GPL1261	GSM684690	GSE27628	back skin
GPL1261	GSM684691	GSE27628	back skin
GPL1261	GSM684692	GSE27628	back skin
GPL1261	GSM684693	GSE27628	back skin
GPL1261	GSM684694	GSE27628	back skin
GPL1261	GSM684695	GSE27628	back skin
GPL1261	GSM684696	GSE27628	back skin
GPL1261	GSM684697	GSE27628	back skin
GPL1261	GSM684698	GSE27628	back skin
GPL1261	GSM684699	GSE27628	back skin
GPL1261	GSM684700	GSE27628	back skin
GPL1261	GSM684701	GSE27628	back skin
GPL1261	GSM684702	GSE27628	back skin
GPL1261	GSM684703	GSE27628	back skin
GPL1261	GSM684704	GSE27628	back skin
GPL1261	GSM684705	GSE27628	back skin
GPL1261	GSM684706	GSE27628	back skin
GPL1261	GSM684707	GSE27628	back skin
GPL1261	GSM684708	GSE27628	back skin
GPL1261	GSM684709	GSE27628	back skin
GPL1261	GSM1105879	GSE45513	skin
GPL1261	GSM1105880	GSE45513	skin
GPL1261	GSM1105881	GSE45513	skin
GPL1261	GSM1105882	GSE45513	skin
GPL1261	GSM1105883	GSE45513	skin
GPL1261	GSM1105884	GSE45513	skin
GPL1261	GSM1356374	GSE56135	skin epithelium
GPL1261	GSM1356375	GSE56135	skin epithelium
GPL1261	GSM1356376	GSE56135	skin epithelium
GPL1261	GSM1356377	GSE56135	skin epithelium
GPL1261	GSM1356378	GSE56135	skin epithelium
GPL1261	GSM531696	GSE21263	dorsal back skin
GPL1261	GSM531697	GSE21263	dorsal back skin
GPL1261	GSM531698	GSE21263	dorsal back skin
GPL1261	GSM531699	GSE21263	dorsal back skin
GPL1261	GSM531700	GSE21263	dorsal back skin
GPL1261	GSM531701	GSE21263	dorsal back skin
GPL1261	GSM531702	GSE21263	dorsal back skin
GPL1261	GSM531703	GSE21263	dorsal back skin
GPL1261	GSM531704	GSE21263	dorsal back skin
GPL1261	GSM531705	GSE21263	dorsal back skin
GPL1261	GSM531706	GSE21263	dorsal back skin
GPL1261	GSM531707	GSE21263	dorsal back skin
GPL1261	GSM531708	GSE21263	dorsal back skin
GPL1261	GSM531709	GSE21263	dorsal back skin
GPL1261	GSM531710	GSE21263	dorsal back skin
GPL1261	GSM531711	GSE21263	dorsal back skin
GPL1261	GSM531712	GSE21263	dorsal back skin
GPL1261	GSM531713	GSE21263	dorsal back skin
GPL1261	GSM531714	GSE21263	dorsal back skin
GPL1261	GSM531715	GSE21263	dorsal back skin
GPL1261	GSM531716	GSE21263	dorsal back skin
GPL1261	GSM531717	GSE21263	dorsal back skin
GPL1261	GSM531718	GSE21263	dorsal back skin
GPL1261	GSM531719	GSE21263	dorsal back skin
GPL1261	GSM531720	GSE21263	dorsal back skin
GPL1261	GSM531721	GSE21263	dorsal back skin
GPL1261	GSM531722	GSE21263	dorsal back skin
GPL1261	GSM531723	GSE21263	dorsal back skin
GPL1261	GSM531724	GSE21263	dorsal back skin
GPL1261	GSM531725	GSE21263	dorsal back skin
GPL1261	GSM531726	GSE21263	dorsal back skin
GPL1261	GSM531727	GSE21263	dorsal back skin
GPL1261	GSM531728	GSE21263	dorsal back skin
GPL1261	GSM531729	GSE21263	dorsal back skin
GPL1261	GSM531730	GSE21263	dorsal back skin
GPL1261	GSM531731	GSE21263	dorsal back skin
GPL1261	GSM531732	GSE21263	dorsal back skin
GPL1261	GSM531733	GSE21263	dorsal back skin
GPL1261	GSM531734	GSE21263	dorsal back skin
GPL1261	GSM531735	GSE21263	dorsal back skin
GPL1261	GSM531736	GSE21263	dorsal back skin
GPL1261	GSM531737	GSE21263	dorsal back skin
GPL1261	GSM531738	GSE21263	dorsal back skin
GPL1261	GSM531739	GSE21263	dorsal back skin
GPL1261	GSM531740	GSE21263	dorsal back skin
GPL1261	GSM531741	GSE21263	dorsal back skin
GPL1261	GSM531742	GSE21263	dorsal back skin
GPL1261	GSM531743	GSE21263	dorsal back skin
GPL1261	GSM531744	GSE21263	dorsal back skin
GPL1261	GSM531745	GSE21263	dorsal back skin
GPL1261	GSM531746	GSE21263	dorsal back skin
GPL1261	GSM531747	GSE21263	dorsal back skin
GPL1261	GSM531748	GSE21263	dorsal back skin
GPL1261	GSM531749	GSE21263	dorsal back skin
GPL1261	GSM531750	GSE21263	dorsal back skin
GPL1261	GSM531751	GSE21263	dorsal back skin
GPL1261	GSM531752	GSE21263	dorsal back skin
GPL1261	GSM531753	GSE21263	dorsal back skin
GPL1261	GSM531754	GSE21263	dorsal back skin
GPL1261	GSM531755	GSE21263	dorsal back skin
GPL1261	GSM531756	GSE21263	dorsal back skin
GPL1261	GSM531757	GSE21263	dorsal back skin
GPL1261	GSM531758	GSE21263	dorsal back skin
GPL1261	GSM531759	GSE21263	dorsal back skin
GPL1261	GSM531760	GSE21263	dorsal back skin
GPL1261	GSM531761	GSE21263	dorsal back skin
GPL1261	GSM531762	GSE21263	dorsal back skin
GPL1261	GSM531763	GSE21263	dorsal back skin
GPL1261	GSM531054	GSE21247	dorsal back skin
GPL1261	GSM531055	GSE21247	dorsal back skin
GPL1261	GSM531056	GSE21247	dorsal back skin
GPL1261	GSM531057	GSE21247	dorsal back skin
GPL1261	GSM531058	GSE21247	dorsal back skin
GPL1261	GSM531059	GSE21247	dorsal back skin
GPL1261	GSM531060	GSE21247	dorsal back skin
GPL1261	GSM531061	GSE21247	dorsal back skin
GPL1261	GSM531062	GSE21247	dorsal back skin
GPL1261	GSM531063	GSE21247	dorsal back skin
GPL1261	GSM531064	GSE21247	dorsal back skin
GPL1261	GSM531065	GSE21247	dorsal back skin
GPL1261	GSM531066	GSE21247	dorsal back skin
GPL1261	GSM531067	GSE21247	dorsal back skin
GPL1261	GSM531068	GSE21247	dorsal back skin
GPL1261	GSM531069	GSE21247	dorsal back skin
GPL1261	GSM531070	GSE21247	dorsal back skin
GPL1261	GSM531071	GSE21247	dorsal back skin
GPL1261	GSM531072	GSE21247	dorsal back skin
GPL1261	GSM531073	GSE21247	dorsal back skin
GPL1261	GSM531074	GSE21247	dorsal back skin
GPL1261	GSM531075	GSE21247	dorsal back skin
GPL1261	GSM531076	GSE21247	dorsal back skin
GPL1261	GSM531077	GSE21247	dorsal back skin
GPL1261	GSM531078	GSE21247	dorsal back skin
GPL1261	GSM531079	GSE21247	dorsal back skin
GPL1261	GSM531080	GSE21247	dorsal back skin
GPL1261	GSM531081	GSE21247	dorsal back skin
GPL1261	GSM531082	GSE21247	dorsal back skin
GPL1261	GSM531083	GSE21247	dorsal back skin
GPL1261	GSM531084	GSE21247	dorsal back skin
GPL1261	GSM531085	GSE21247	dorsal back skin
GPL1261	GSM531086	GSE21247	dorsal back skin
GPL1261	GSM531087	GSE21247	dorsal back skin
GPL1261	GSM531088	GSE21247	dorsal back skin
GPL1261	GSM531089	GSE21247	dorsal back skin
GPL1261	GSM531090	GSE21247	dorsal back skin
GPL1261	GSM531091	GSE21247	dorsal back skin
GPL1261	GSM531092	GSE21247	dorsal back skin
GPL1261	GSM531093	GSE21247	dorsal back skin
GPL1261	GSM531094	GSE21247	dorsal back skin
GPL1261	GSM531095	GSE21247	dorsal back skin
GPL1261	GSM531096	GSE21247	dorsal back skin
GPL1261	GSM531097	GSE21247	dorsal back skin
GPL1261	GSM531098	GSE21247	dorsal back skin
GPL1261	GSM531099	GSE21247	dorsal back skin
GPL1261	GSM531100	GSE21247	dorsal back skin
GPL1261	GSM531101	GSE21247	dorsal back skin
GPL1261	GSM531102	GSE21247	dorsal back skin
GPL1261	GSM531103	GSE21247	dorsal back skin
GPL1261	GSM531104	GSE21247	dorsal back skin
GPL1261	GSM531105	GSE21247	dorsal back skin
GPL1261	GSM531106	GSE21247	dorsal back skin
GPL1261	GSM531107	GSE21247	dorsal back skin
GPL1261	GSM531108	GSE21247	dorsal back skin
GPL1261	GSM531109	GSE21247	dorsal back skin
GPL1261	GSM531110	GSE21247	dorsal back skin
GPL1261	GSM531111	GSE21247	dorsal back skin
GPL1261	GSM531112	GSE21247	dorsal back skin
GPL1261	GSM531113	GSE21247	dorsal back skin

## Sheet: Homo sapiens
Platform	Chip Data	Series_geo_accession	Tissues
GPL570	GSM372286	GSE14905	Skin biopsy samples
GPL570	GSM372287	GSE14905	Skin biopsy samples
GPL570	GSM372288	GSE14905	Skin biopsy samples
GPL570	GSM372289	GSE14905	Skin biopsy samples
GPL570	GSM372290	GSE14905	Skin biopsy samples
GPL570	GSM372291	GSE14905	Skin biopsy samples
GPL570	GSM372292	GSE14905	Skin biopsy samples
GPL570	GSM372293	GSE14905	Skin biopsy samples
GPL570	GSM372294	GSE14905	Skin biopsy samples
GPL570	GSM372295	GSE14905	Skin biopsy samples
GPL570	GSM372296	GSE14905	Skin biopsy samples
GPL570	GSM372297	GSE14905	Skin biopsy samples
GPL570	GSM372298	GSE14905	Skin biopsy samples
GPL570	GSM372299	GSE14905	Skin biopsy samples
GPL570	GSM372300	GSE14905	Skin biopsy samples
GPL570	GSM372301	GSE14905	Skin biopsy samples
GPL570	GSM372302	GSE14905	Skin biopsy samples
GPL570	GSM372303	GSE14905	Skin biopsy samples
GPL570	GSM372304	GSE14905	Skin biopsy samples
GPL570	GSM372305	GSE14905	Skin biopsy samples
GPL570	GSM372306	GSE14905	Skin biopsy samples
GPL570	GSM767976	GSE30999	Skin biopsy samples
GPL570	GSM767978	GSE30999	Skin biopsy samples
GPL570	GSM767980	GSE30999	Skin biopsy samples
GPL570	GSM767982	GSE30999	Skin biopsy samples
GPL570	GSM767984	GSE30999	Skin biopsy samples
GPL570	GSM767986	GSE30999	Skin biopsy samples
GPL570	GSM767988	GSE30999	Skin biopsy samples
GPL570	GSM767989	GSE30999	Skin biopsy samples
GPL570	GSM767991	GSE30999	Skin biopsy samples
GPL570	GSM767993	GSE30999	Skin biopsy samples
GPL570	GSM767995	GSE30999	Skin biopsy samples
GPL570	GSM767997	GSE30999	Skin biopsy samples
GPL570	GSM767999	GSE30999	Skin biopsy samples
GPL570	GSM768000	GSE30999	Skin biopsy samples
GPL570	GSM768002	GSE30999	Skin biopsy samples
GPL570	GSM768003	GSE30999	Skin biopsy samples
GPL570	GSM768005	GSE30999	Skin biopsy samples
GPL570	GSM768007	GSE30999	Skin biopsy samples
GPL570	GSM768009	GSE30999	Skin biopsy samples
GPL570	GSM768011	GSE30999	Skin biopsy samples
GPL570	GSM768013	GSE30999	Skin biopsy samples
GPL570	GSM768015	GSE30999	Skin biopsy samples
GPL570	GSM768017	GSE30999	Skin biopsy samples
GPL570	GSM768019	GSE30999	Skin biopsy samples
GPL570	GSM768021	GSE30999	Skin biopsy samples
GPL570	GSM768023	GSE30999	Skin biopsy samples
GPL570	GSM768025	GSE30999	Skin biopsy samples
GPL570	GSM768027	GSE30999	Skin biopsy samples
GPL570	GSM768029	GSE30999	Skin biopsy samples
GPL570	GSM768031	GSE30999	Skin biopsy samples
GPL570	GSM768033	GSE30999	Skin biopsy samples
GPL570	GSM768035	GSE30999	Skin biopsy samples
GPL570	GSM768037	GSE30999	Skin biopsy samples
GPL570	GSM768039	GSE30999	Skin biopsy samples
GPL570	GSM768041	GSE30999	Skin biopsy samples
GPL570	GSM768043	GSE30999	Skin biopsy samples
GPL570	GSM768046	GSE30999	Skin biopsy samples
GPL570	GSM768048	GSE30999	Skin biopsy samples
GPL570	GSM768050	GSE30999	Skin biopsy samples
GPL570	GSM768052	GSE30999	Skin biopsy samples
GPL570	GSM768054	GSE30999	Skin biopsy samples
GPL570	GSM768056	GSE30999	Skin biopsy samples
GPL570	GSM768058	GSE30999	Skin biopsy samples
GPL570	GSM768059	GSE30999	Skin biopsy samples
GPL570	GSM768061	GSE30999	Skin biopsy samples
GPL570	GSM768062	GSE30999	Skin biopsy samples
GPL570	GSM768064	GSE30999	Skin biopsy samples
GPL570	GSM768066	GSE30999	Skin biopsy samples
GPL570	GSM768068	GSE30999	Skin biopsy samples
GPL570	GSM768070	GSE30999	Skin biopsy samples
GPL570	GSM768072	GSE30999	Skin biopsy samples
GPL570	GSM768074	GSE30999	Skin biopsy samples
GPL570	GSM768076	GSE30999	Skin biopsy samples
GPL570	GSM768078	GSE30999	Skin biopsy samples
GPL570	GSM768080	GSE30999	Skin biopsy samples
GPL570	GSM768082	GSE30999	Skin biopsy samples
GPL570	GSM768084	GSE30999	Skin biopsy samples
GPL570	GSM768086	GSE30999	Skin biopsy samples
GPL570	GSM768088	GSE30999	Skin biopsy samples
GPL570	GSM768090	GSE30999	Skin biopsy samples
GPL570	GSM768092	GSE30999	Skin biopsy samples
GPL570	GSM768094	GSE30999	Skin biopsy samples
GPL570	GSM768096	GSE30999	Skin biopsy samples
GPL570	GSM768098	GSE30999	Skin biopsy samples
GPL570	GSM768100	GSE30999	Skin biopsy samples
GPL570	GSM768102	GSE30999	Skin biopsy samples
GPL570	GSM768104	GSE30999	Skin biopsy samples
GPL570	GSM768106	GSE30999	Skin biopsy samples
GPL570	GSM768108	GSE30999	Skin biopsy samples
GPL570	GSM768110	GSE30999	Skin biopsy samples
GPL570	GSM768112	GSE30999	Skin biopsy samples
GPL570	GSM768114	GSE30999	Skin biopsy samples
GPL570	GSM768116	GSE30999	Skin biopsy samples
GPL570	GSM768118	GSE30999	Skin biopsy samples
GPL570	GSM768120	GSE30999	Skin biopsy samples
GPL570	GSM768122	GSE30999	Skin biopsy samples
GPL570	GSM768124	GSE30999	Skin biopsy samples
GPL570	GSM768126	GSE30999	Skin biopsy samples
GPL570	GSM768128	GSE30999	Skin biopsy samples
GPL570	GSM768130	GSE30999	Skin biopsy samples
GPL570	GSM768132	GSE30999	Skin biopsy samples
GPL570	GSM768134	GSE30999	Skin biopsy samples
GPL570	GSM768136	GSE30999	Skin biopsy samples
GPL570	GSM768138	GSE30999	Skin biopsy samples
GPL570	GSM768140	GSE30999	Skin biopsy samples
GPL570	GSM768142	GSE30999	Skin biopsy samples
GPL570	GSM768144	GSE30999	Skin biopsy samples
GPL570	GSM1638783	GSE67098	dispase separated epidermis
GPL570	GSM1638784	GSE67098	dispase separated epidermis
GPL570	GSM1638785	GSE67098	dispase separated epidermis
GPL570	GSM1638786	GSE67098	dispase separated epidermis
GPL570	GSM1638787	GSE67098	dispase separated epidermis
GPL570	GSM1638788	GSE67098	dispase separated epidermis
GPL570	GSM1638789	GSE67098	dispase separated epidermis
GPL570	GSM1638790	GSE67098	dispase separated epidermis
GPL570	GSM1638791	GSE67098	dispase separated epidermis
GPL570	GSM1638792	GSE67098	dispase separated epidermis
GPL570	GSM1638793	GSE67098	dispase separated epidermis
GPL570	GSM1638794	GSE67098	dispase separated epidermis
GPL570	GSM1638795	GSE67098	dispase separated epidermis
GPL570	GSM1638796	GSE67098	dispase separated epidermis
GPL570	GSM1638797	GSE67098	dispase separated epidermis
GPL570	GSM1638798	GSE67098	dispase separated epidermis
GPL570	GSM815451	GSE32924	skin
GPL570	GSM815452	GSE32924	skin
GPL570	GSM815453	GSE32924	skin
GPL570	GSM815454	GSE32924	skin
GPL570	GSM815455	GSE32924	skin
GPL570	GSM815456	GSE32924	skin
GPL570	GSM815457	GSE32924	skin
GPL570	GSM815458	GSE32924	skin
