# Supplementary material for: Analyzing the miRNA-Gene Networks to Mine the Important miRNAs under Skin of Human and Mouse
Source: Biomed Res Int. 2016 Sep 5;2016:5469371. doi: 10.1155/2016/5469371 (PMC5027296; doi:10.1155/2016/5469371)
Supplement: Supplementary file 1 — Figure S1: A summarizes this entire methodology. 1627 of these genes are related with the integument phenotype (MP:0010771). The expression data of 1487 IGs of mouse and human were downloaded from the Gene Expression Omnibus (GEO). MicroRNAs (miRNAs) that potential regulate IGs were predicted by miRanda, miRTarBase and miRDB. The regulation network of miRNAs-IGs and IGs-IGs was integrated, and the networks were visualized in Cytoscape. Figure S2: Chromosome location for integument genes, left for human and right for mouse. The distribution of IGs on chromosomes for human and mouse was investigated by two R packages (org.Mm.eg.db and org.Hs.eg.db). 1627 IGs are dispersed along the chromosomes of human and mouse. Table S1: The informations of microarray data used in this paper. Table S2: The common pairs of miRNA-target gene predicted by three databases (miRanda, miRTarBase and miRDB). [file 5469371.f1.zip › supplementary materials/Table S2 The common pairs of miRNA-target gene predicted by three databases.xls]

## Sheet: Pairs of miRNA-Gene in mouse
miRNAs	Genes
mmu-let-7b-5p	LRIG2
mmu-miR-106a-5p	STAT3
mmu-miR-1187	BCL2
mmu-miR-1187	MAVS
mmu-miR-1187	RUNX1
mmu-miR-1187	SMARCA2
mmu-miR-1192	GNA13
mmu-miR-1192	KRAS
mmu-miR-1192	SIRT6
mmu-miR-1192	TFAM
mmu-miR-124-3p	CEBPA
mmu-miR-124-3p	TRAF6
mmu-miR-126a-5p	SHH
mmu-miR-130a-3p	MEOX2
mmu-miR-132-3p	FOXO3
mmu-miR-136-5p	ATRN
mmu-miR-136-5p	GRIA1
mmu-miR-141-3p	ZEB1
mmu-miR-146a-5p	TRAF6
mmu-miR-148a-3p	ROBO1
mmu-miR-148b-3p	ROBO1
mmu-miR-149-5p	ADCY1
mmu-miR-149-5p	ITPA
mmu-miR-152-3p	ROBO1
mmu-miR-15a-5p	CLOCK
mmu-miR-15a-5p	LRIG2
mmu-miR-17-5p	STAT3
mmu-miR-181a-5p	ADCY1
mmu-miR-181a-5p	FBXL3
mmu-miR-182-5p	FBXW7
mmu-miR-185-5p	NF2
mmu-miR-1903	NHLH2
mmu-miR-1943-5p	SERPINE1
mmu-miR-1946a	PFAS
mmu-miR-1952	FIGN
mmu-miR-19b-3p	ADCY1
mmu-miR-19b-3p	NBEA
mmu-miR-200a-3p	ZEB1
mmu-miR-200b-3p	PKD1
mmu-miR-200b-3p	ZEB1
mmu-miR-200b-3p	ZFPM2
mmu-miR-200c-3p	ZEB1
mmu-miR-200c-3p	ZFPM2
mmu-miR-204-5p	SOX11
mmu-miR-20a-5p	STAT3
mmu-miR-216a-5p	MYSM1
mmu-miR-22-3p	MECP2
mmu-miR-24-3p	PLEC
mmu-miR-25-3p	FBXW7
mmu-miR-297a-5p	ATRN
mmu-miR-297a-5p	CD28
mmu-miR-297a-5p	TCEB3
mmu-miR-297b-5p	CD28
mmu-miR-297b-5p	GNAQ
mmu-miR-297b-5p	SNAP25
mmu-miR-297c-5p	CD28
mmu-miR-297c-5p	SNAP25
mmu-miR-298-5p	VDR
mmu-miR-29b-3p	FBN1
mmu-miR-3062-5p	ACPP
mmu-miR-3062-5p	TACR1
mmu-miR-3065-5p	SPP1
mmu-miR-3082-5p	SOD2
mmu-miR-30e-5p	ZDHHC21
mmu-miR-31-5p	IKZF1
mmu-miR-329-3p	TMPRSS13
mmu-miR-329-3p	USF2
mmu-miR-340-5p	IDS
mmu-miR-340-5p	TGFBR1
mmu-miR-340-5p	WDR37
mmu-miR-342-3p	CISD2
mmu-miR-342-3p	SFN
mmu-miR-3470b	BCKDK
mmu-miR-34a-5p	NOTCH1
mmu-miR-377-3p	ADAMTS9
mmu-miR-377-3p	CISD2
mmu-miR-377-3p	SFN
mmu-miR-429-3p	ZEB1
mmu-miR-466a-5p	CASP8
mmu-miR-466a-5p	MAVS
mmu-miR-466a-5p	RUNX1
mmu-miR-466b-3p	CHEK1
mmu-miR-466b-3p	NRAS
mmu-miR-466c-3p	CHEK1
mmu-miR-466c-3p	NRAS
mmu-miR-466d-5p	BCL2
mmu-miR-466d-5p	CASK
mmu-miR-466d-5p	CD274
mmu-miR-466d-5p	CD4
mmu-miR-466d-5p	CHRNB4
mmu-miR-466d-5p	ECE1
mmu-miR-466d-5p	FECH
mmu-miR-466d-5p	GFRA2
mmu-miR-466d-5p	GNA13
mmu-miR-466d-5p	GRASP
mmu-miR-466d-5p	GRIA3
mmu-miR-466d-5p	HOXC8
mmu-miR-466d-5p	HTT
mmu-miR-466d-5p	KCNIP3
mmu-miR-466d-5p	KCNJ1
mmu-miR-466d-5p	KCNJ16
mmu-miR-466d-5p	MAF
mmu-miR-466d-5p	MDM2
mmu-miR-466d-5p	NAB1
mmu-miR-466d-5p	NAB2
mmu-miR-466d-5p	NQO2
mmu-miR-466d-5p	OPRM1
mmu-miR-466d-5p	OXTR
mmu-miR-466d-5p	PRDM8
mmu-miR-466d-5p	PTPRB
mmu-miR-466d-5p	RUNX1
mmu-miR-466d-5p	RUNX3
mmu-miR-466d-5p	SMARCA2
mmu-miR-466d-5p	SNAI2
mmu-miR-466d-5p	SNAP25
mmu-miR-466d-5p	TACR1
mmu-miR-466d-5p	TBX15
mmu-miR-466d-5p	WRN
mmu-miR-466e-5p	CASP8
mmu-miR-466e-5p	MAVS
mmu-miR-466e-5p	RUNX1
mmu-miR-466f-3p	CHEK1
mmu-miR-466f-3p	CNR1
mmu-miR-466f-3p	IDS
mmu-miR-466f-3p	MMP12
mmu-miR-466f-3p	PLCL1
mmu-miR-466f-3p	TLR4
mmu-miR-466f-3p	VEGFA
mmu-miR-466i-3p	ADAMTS9
mmu-miR-466i-3p	IDS
mmu-miR-466i-3p	WFS1
mmu-miR-466i-5p	BCL2
mmu-miR-466i-5p	CASK
mmu-miR-466i-5p	CASP8
mmu-miR-466i-5p	CD274
mmu-miR-466i-5p	CD4
mmu-miR-466i-5p	CHRNB4
mmu-miR-466i-5p	ECE1
mmu-miR-466i-5p	FECH
mmu-miR-466i-5p	GFRA2
mmu-miR-466i-5p	GNA13
mmu-miR-466i-5p	GRASP
mmu-miR-466i-5p	GRIA3
mmu-miR-466i-5p	HOXC8
mmu-miR-466i-5p	KCNIP3
mmu-miR-466i-5p	KCNJ1
mmu-miR-466i-5p	KCNJ16
mmu-miR-466i-5p	MAF
mmu-miR-466i-5p	MDM2
mmu-miR-466i-5p	NAB1
mmu-miR-466i-5p	NAB2
mmu-miR-466i-5p	NGFR
mmu-miR-466i-5p	NQO2
mmu-miR-466i-5p	OPRM1
mmu-miR-466i-5p	OXTR
mmu-miR-466i-5p	PIRT
mmu-miR-466i-5p	PRDM8
mmu-miR-466i-5p	PTGDR
mmu-miR-466i-5p	PTPRB
mmu-miR-466i-5p	RUNX1
mmu-miR-466i-5p	RUNX3
mmu-miR-466i-5p	SMARCA2
mmu-miR-466i-5p	SNAI2
mmu-miR-466i-5p	SNAP25
mmu-miR-466i-5p	TACR1
mmu-miR-466i-5p	TBX15
mmu-miR-466i-5p	WRN
mmu-miR-466k	BCL2
mmu-miR-466k	CASK
mmu-miR-466k	CASP8
mmu-miR-466k	CD274
mmu-miR-466k	CD4
mmu-miR-466k	CHRNB4
mmu-miR-466k	ECE1
mmu-miR-466k	FECH
mmu-miR-466k	GFRA2
mmu-miR-466k	GNA13
mmu-miR-466k	GRASP
mmu-miR-466k	GRIA3
mmu-miR-466k	HOXC8
mmu-miR-466k	HTT
mmu-miR-466k	KCNIP3
mmu-miR-466k	KCNJ1
mmu-miR-466k	KCNJ16
mmu-miR-466k	MAF
mmu-miR-466k	MDM2
mmu-miR-466k	NAB1
mmu-miR-466k	NAB2
mmu-miR-466k	NQO2
mmu-miR-466k	OXTR
mmu-miR-466k	PRDM8
mmu-miR-466k	PTPRB
mmu-miR-466k	RUNX1
mmu-miR-466k	RUNX3
mmu-miR-466k	SMARCA2
mmu-miR-466k	SNAI2
mmu-miR-466k	SNAP25
mmu-miR-466k	TACR1
mmu-miR-466k	TBX15
mmu-miR-466k	WRN
mmu-miR-466l-3p	TMC1
mmu-miR-466l-5p	BCL2
mmu-miR-466l-5p	CASK
mmu-miR-466l-5p	CASP8
mmu-miR-466l-5p	CD274
mmu-miR-466l-5p	CD28
mmu-miR-466l-5p	CD4
mmu-miR-466l-5p	CHRNB4
mmu-miR-466l-5p	ECE1
mmu-miR-466l-5p	FECH
mmu-miR-466l-5p	GFRA2
mmu-miR-466l-5p	GNA13
mmu-miR-466l-5p	GRASP
mmu-miR-466l-5p	GRIA3
mmu-miR-466l-5p	HOXC8
mmu-miR-466l-5p	HTT
mmu-miR-466l-5p	KCNIP3
mmu-miR-466l-5p	KCNJ1
mmu-miR-466l-5p	KCNJ16
mmu-miR-466l-5p	MAF
mmu-miR-466l-5p	MDM2
mmu-miR-466l-5p	NAB1
mmu-miR-466l-5p	NAB2
mmu-miR-466l-5p	NQO2
mmu-miR-466l-5p	OXTR
mmu-miR-466l-5p	PRDM8
mmu-miR-466l-5p	PTPRB
mmu-miR-466l-5p	RUNX1
mmu-miR-466l-5p	RUNX3
mmu-miR-466l-5p	SMARCA2
mmu-miR-466l-5p	SNAI2
mmu-miR-466l-5p	SNAP25
mmu-miR-466l-5p	TACR1
mmu-miR-466l-5p	TBX15
mmu-miR-466l-5p	WRN
mmu-miR-466m-3p	CHEK1
mmu-miR-466m-3p	IDS
mmu-miR-466m-3p	NRAS
mmu-miR-466n-5p	OXTR
mmu-miR-466o-3p	CHEK1
mmu-miR-466o-3p	CNR1
mmu-miR-466o-3p	IDS
mmu-miR-466o-3p	NRAS
mmu-miR-466p-3p	CHEK1
mmu-miR-466p-3p	NRAS
mmu-miR-466p-5p	CASP8
mmu-miR-466p-5p	RUNX1
mmu-miR-466q	TLL1
mmu-miR-466q	TNFRSF9
mmu-miR-495-3p	BDNF
mmu-miR-495-3p	SOD2
mmu-miR-5101	BDNF
mmu-miR-5101	RAD18
mmu-miR-5110	LBH
mmu-miR-5110	PDPK1
mmu-miR-5128	RAPH1
mmu-miR-574-5p	GRIA3
mmu-miR-669f-3p	MECP2
mmu-miR-669n	GRIA3
mmu-miR-706	KL
mmu-miR-709	PIN1
mmu-miR-721	MEOX2
mmu-miR-7b-5p	IDS
mmu-miR-9-5p	CDC73
mmu-miR-9-5p	CLOCK
mmu-miR-9-5p	SOCS5

## Sheet: Pairs of miRNA-Gene in human
miRNAs	Genes
hsa-let-7b-5p	IGF1R
hsa-let-7b-5p	MIB1
hsa-let-7c-5p	CBL
hsa-let-7f-5p	IGF1R
hsa-miR-101-3p	EZH2
hsa-miR-103a-3p	DICER1
hsa-miR-106a-5p	E2F1
hsa-miR-106a-5p	LDLR
hsa-miR-106a-5p	STAT3
hsa-miR-106b-5p	LDLR
hsa-miR-106b-5p	STAT3
hsa-miR-107	DICER1
hsa-miR-122-5p	SLC9A1
hsa-miR-125b-5p	ETS1
hsa-miR-126-5p	ADAM9
hsa-miR-1277-5p	PPP1R15B
hsa-miR-1277-5p	VEGFA
hsa-miR-1294	IGF1R
hsa-miR-129-5p	ETV6
hsa-miR-130a-3p	CSF1
hsa-miR-130a-3p	DICER1
hsa-miR-130a-3p	GJA1
hsa-miR-130a-3p	LDLR
hsa-miR-130a-3p	MEOX2
hsa-miR-130b-3p	CSF1
hsa-miR-130b-3p	DICER1
hsa-miR-130b-3p	LDLR
hsa-miR-132-3p	SIRT1
hsa-miR-137	NCOA3
hsa-miR-137	PTGS2
hsa-miR-1-3p	BDNF
hsa-miR-141-3p	E2F3
hsa-miR-141-3p	ZEB1
hsa-miR-149-3p	FGFR1
hsa-miR-150-5p	CBL
hsa-miR-155-5p	EGFR
hsa-miR-15a-5p	SHOC2
hsa-miR-15b-5p	DMTF1
hsa-miR-15b-5p	SHOC2
hsa-miR-16-5p	CRKL
hsa-miR-16-5p	KIF1B
hsa-miR-16-5p	MTHFR
hsa-miR-16-5p	MYB
hsa-miR-16-5p	NOTCH2
hsa-miR-17-5p	E2F1
hsa-miR-17-5p	LDLR
hsa-miR-17-5p	NCOA3
hsa-miR-17-5p	STAT3
hsa-miR-181a-5p	PDGFRA
hsa-miR-182-5p	MITF
hsa-miR-185-5p	AR
hsa-miR-185-5p	RAE1
hsa-miR-18a-5p	ESR1
hsa-miR-18b-5p	ESR1
hsa-miR-192-5p	DICER1
hsa-miR-199a-5p	DDR1
hsa-miR-199a-5p	KL
hsa-miR-199b-5p	DDR1
hsa-miR-19a-3p	LDLR
hsa-miR-19b-3p	LDLR
hsa-miR-200a-3p	ZEB1
hsa-miR-200b-3p	FN1
hsa-miR-200b-3p	ZEB1
hsa-miR-200b-3p	ZFPM2
hsa-miR-200c-3p	FN1
hsa-miR-200c-3p	KDR
hsa-miR-200c-3p	PTPRZ1
hsa-miR-200c-3p	ZEB1
hsa-miR-200c-3p	ZFPM2
hsa-miR-203a-3p	CASK
hsa-miR-203a-3p	SRC
hsa-miR-203a-3p	ZEB1
hsa-miR-20a-3p	NF1
hsa-miR-20a-5p	E2F1
hsa-miR-20a-5p	LDLR
hsa-miR-20a-5p	NCOA3
hsa-miR-20a-5p	STAT3
hsa-miR-20b-5p	LDLR
hsa-miR-20b-5p	NCOA3
hsa-miR-20b-5p	STAT3
hsa-miR-214-5p	CCND1
hsa-miR-215-5p	DICER1
hsa-miR-21-5p	STAT3
hsa-miR-218-5p	IKBKB
hsa-miR-218-5p	RUNX2
hsa-miR-223-3p	FOXO1
hsa-miR-223-3p	SP3
hsa-miR-22-3p	ESR1
hsa-miR-23a-3p	PTEN
hsa-miR-23b-3p	PTEN
hsa-miR-24-3p	BCL2L11
hsa-miR-25-3p	MAP2K4
hsa-miR-26a-5p	PTEN
hsa-miR-26b-5p	LRRC2
hsa-miR-27a-3p	EGFR
hsa-miR-27b-3p	EDNRA
hsa-miR-29a-3p	AKT2
hsa-miR-29b-3p	AKT2
hsa-miR-29b-3p	COL5A3
hsa-miR-301a-3p	LDLR
hsa-miR-301a-3p	MEOX2
hsa-miR-301b-3p	LDLR
hsa-miR-302b-3p	EGFR
hsa-miR-302d-3p	TRPS1
hsa-miR-30c-5p	SLC35C1
hsa-miR-30e-5p	FOXG1
hsa-miR-3121-3p	ACVR1B
hsa-miR-320a	TSC1
hsa-miR-32-5p	BCL2L11
hsa-miR-32-5p	MYO5A
hsa-miR-32-5p	PTEN
hsa-miR-34a-5p	JAG1
hsa-miR-34a-5p	MDM4
hsa-miR-34a-5p	NOTCH1
hsa-miR-3591-5p	CTNNB1
hsa-miR-3613-3p	SH3BP2
hsa-miR-3613-3p	SOX4
hsa-miR-362-5p	CYLD
hsa-miR-3666	LDLR
hsa-miR-369-3p	FZD6
hsa-miR-374c-5p	FZD6
hsa-miR-377-3p	SOD2
hsa-miR-3919	IGF1R
hsa-miR-3927-3p	IGF1R
hsa-miR-3929	MDM2
hsa-miR-424-5p	FGFR1
hsa-miR-424-5p	SHOC2
hsa-miR-429	ZEB1
hsa-miR-429	ZFPM2
hsa-miR-449a	NOTCH1
hsa-miR-451b	VEGFA
hsa-miR-4668-5p	IGF1R
hsa-miR-4668-5p	SHOC2
hsa-miR-4703-5p	SHOC2
hsa-miR-4713-5p	ATP2B1
hsa-miR-486-5p	SERPINE1
hsa-miR-497-5p	DMTF1
hsa-miR-548aj-5p	SMAD4
hsa-miR-548c-3p	NCOA3
hsa-miR-548f-5p	SMAD4
hsa-miR-548g-5p	SMAD4
hsa-miR-548p	RAB18
hsa-miR-548x-5p	SMAD4
hsa-miR-5589-5p	BCL2L11
hsa-miR-5590-5p	NR3C1
hsa-miR-561-3p	MSH6
hsa-miR-5692a	CBFB
hsa-miR-5696	XIAP
hsa-miR-6124	IGF1R
hsa-miR-665	BLOC1S3
hsa-miR-6740-5p	IGF1R
hsa-miR-6748-3p	CCND1
hsa-miR-6768-5p	SMCHD1
hsa-miR-6838-5p	SHOC2
hsa-miR-7-5p	EGFR
hsa-miR-7-5p	SLC6A9
hsa-miR-8485	IGF1R
hsa-miR-8485	NCOA3
hsa-miR-93-5p	E2F1
hsa-miR-93-5p	IRF1
hsa-miR-93-5p	LDLR
hsa-miR-93-5p	NCOA3
hsa-miR-93-5p	STAT3
hsa-miR-93-5p	TBC1D20
hsa-miR-9-3p	ITGB1
hsa-miR-9-5p	AP3B1
hsa-miR-98-5p	IGF1R
